# Supplementary material for: Transcriptome analysis reveals gene expression differences in Liriomyza trifolii exposed to combined heat and abamectin exposure
Source: PeerJ journal article supplement (doi:10.7717/peerj.12064), 2021-08-31
Supplement: qPCR-raw_data.xlsx [file qPCR-raw_data.xlsx]

## Sheet: Sheet1
	37924		33242		33565		35579		39889		38127		34863		37369		36316		40124
CK1	0.818177	1.01047	0.72276	1.02891	0.58775	1.07692	1.30339	1.08895	0.836637	1.12477	0.718293	1.0262	0.572434	1.16465	0.70413	1.10629	0.580735	1.07429	1.16931	1.00941
CK2	1.11781		1.33413		1.5019		1.4196		1.91455		1.14436		2.09071		1.83106		1.48503		0.948899
CK3	1.09543		1.02985		1.14111		0.543855		0.62311		1.21594		0.83081		0.783688		1.15712		0.910032
40 1	0.186181	0.264447	6.45667	9.91905	3.65186	4.78267	0.345811	0.403005	29.8837	42.8455	0.354049	0.504692	0.339731	0.763894	0.407959	0.475079	0.324856	0.419134	0.832446	1.35717
40 2	0.32236		13.2074		5.54277		0.412319		52.2953		0.673709		1.29413		0.548843		0.499109		1.73537
40 3	0.284799		10.0931		5.1534		0.450886		46.3576		0.486317		0.657822		0.468435		0.433437		1.50369
50 1	0.546558	0.346316	2.15019	2.94918	2.80869	3.00826	0.405238	0.2716	1.91713	1.22716	0.822445	0.371489	1.62729	8.70433	0.728656	0.478322	1.66917	1.71473	3.71453	2.59081
50 2	0.224329		2.40635		3.46016		0.218		0.54748		0.0858373		15.5347		0.311202		1.67976		1.72199
50 3	0.268061		4.29101		2.75594		0.191561		1.21688		0.206184		8.95099		0.395108		1.79525		2.33589
4050 1	0.373651	0.378607	5.61002	5.79003	3.04391	3.74216	0.0658555	0.111339	4.12014	9.42422	0.220623	0.409409	2.34465	2.77533	0.604119	1.48734	1.70664	1.42351	1.10867	1.7557
4050 2	0.3226		5.66985		4.26117		0.139464		9.4775		0.265651		4.9656		2.47531		1.61058		1.49025
4050 3	0.439569		6.09023		3.9214		0.128699		14.675		0.741951		1.01574		1.38261		0.953317		2.66819
5040 1	0.631684	0.641209	17.551	17.6877	11.2315	13.5579	0.180499	0.366941	76.8297	70.05	0.482084	0.492168	3.77026	2.17288	0.358096	0.512792	1.31487	1.33271	0.752087	0.804168
5040 2	0.513177		17.5827		10.1799		0.183618		44.9839		0.403206		1.18698		0.270116		1.05291		0.404379
5040 3	0.778764		17.9295		19.2622		0.736706		88.3364		0.591216		1.56139		0.910164		1.63036		1.25604

## Sheet: Sheet2
17555		AV	MO	AM
	2550 1	0.817687	0.560237	1.27562
	2550 2	1.10065	1.89144	0.602555
	2550 3	1.1186	0.93769	1.30732
	4050 1	1.01072	51.5633	3.93502
	4050 2	7.34674	31.4823	0.295521
	4050 3	3.61129	61.7201	2.11485
17960
	2550 1	0.889399	1.37476	1.89231
	2550 2	0.986423	1.93656	0.545826
	2550 3	1.15063	0.371762	0.964843
	4050 1	23.3149	16.33	0.693601
	4050 2	19.9504	33.1055	0.184316
	4050 3	10.1974	25.2455	1.6309
30008
	2550 1	1.33875	1.48203	0.701351
	2550 2	0.987765	1.25411	0.496025
	2550 3	0.752409	0.53743	2.88307
	4050 1	3.34664	20.2918	1.00085
	4050 2	4.79328	26.8259	0.298908
	4050 3	5.77212	34.0088	0.825585
28892
	2550 1	1.10964	1.50612	2.06947
	2550 2	0.909927	1.11718	0.280945
	2550 3	0.99103	0.597463	1.73177
	4050 1	0.682372	10.2341	0.18184
	4050 2	0.673477	6.96695	0.100377
	4050 3	2.05249	9.33728	0.680934
31645
	2550 1	0.980844	1.78977	0.727388
	2550 2	1.76726	1.1661	0.641418
	2550 3	0.580783	0.480198	2.14216
	4050 1	2.18035	19.384	1.11907
	4050 2	2.91501	9.77332	0.135066
	4050 3	1.76883	10.7103	1.95582
32370
	2550 1	1.32716	0.484879	0.337654
	2550 2	0.901098	3.79069	0.984207
	2550 3	0.831681	0.541149	3.01089
	4050 1	5.06731	241.585	12.134
	4050 2	5.1708	115.281	0.972869
	4050 3	3.44177	529.208	8.87691
