# Supplementary material for: Transcriptome analysis reveals gene expression differences in Liriomyza trifolii exposed to combined heat and abamectin exposure
Source: PeerJ journal article supplement (doi:10.7717/peerj.12064), 2021-08-31
Supplement: Table_S1.docx [file Table_S1.docx]

**Table S1** Primers used in real-time quantitative PCR.

| Gene | Primer sequences (5’→3’) | | Statistical tests |
| --- | --- | --- | --- |
| c37924.graph_c0 | F | TTTCGTGATAATGTGTCCTCTCTG | *F*4, 10 = 16.438  *P* < 0.05 |
| R | CTCCAGTTGATACAAAAGGACTCT |
|  | | | |
| c33242.graph_c1 | F | GCTTTGAATGATGCTAAAATGGAC | *F*4, 10 = 50.567  *P* < 0.05 |
| R | TGGATTGATAGACAGATTCAGGCT |
|  | | | |
| c33565.graph_c0 | F | GAAACAAGATGACGGTTCCACAG | *F*4, 10 = 13.326  *P* < 0.05 |
| R | ATGTAGCCGTGCTCATCCTGTT |
|  | | | |
| c35579.graph_c0 | F | CCATTTTACCAACGAGAAAGGAG | *F*4, 10 = 6.098  *P* < 0.05 |
| R | GTCAGCACCCACATTTTTACAGG |
|  | | | |
| c39889.graph_c1 | F | TATTGAGTGGCGACAAGAGCA | *F*4, 10 = 20.917  *P* < 0.05 |
| R | TAACTCCACCAGCCGTTTCAA |
|  | | | |
| c38127.graph_c2 | F | AATGATGTAGGAGCCAAGCGTC | *F*4, 10 = 3.063  *P* = 0.069 |
| R | CCAGCAGAGGTAGTGTCGTGTC |
|  | | | |
| c34863.graph_c0 | F | CACCCTCCGCAGTTACCTTTAC | *F*4, 10 = 2.820  *P* = 0.084 |
| R | AGTTTTCCCTGGCTTGTATCTT |
|  | | | |
| c37369.graph_c0 | F | TAGTGCTCTGAGTGGTTTGGGA | *F*4, 10 = 2.212  *P* = 0.141 |
| R | ATGAGGAATAATGGACCAAGGA |
|  | | | |
| c36316.graph_c0 | F | ACTGGTGGGGAAGGTTTTATCAA | *F*4, 10 =7.579  *P* < 0.05 |
| R | GCACGCAGTTCATCATTTACCA |
|  | | | |
| c40124.graph_c0 | F | TGCGAAGGTGGTCAAGGAAGATA | *F*4, 10 =3.530  *P* < 0.05 |
| R | CCAAGGCACCACCGTGTAGACT |
|  | | | |
| c17555.graph_c0 | F | GGAGGCAGATAAAAAGGACGAC | AB: *t*=-1.617, *p*=0.181;  MO: *t*=-5.299, *p* < 0.05;  AM: *t*=-0.979, *p*=0.383 |
| R | ATAGCAATAAGCCAGAAGAGCC |
|  | | | |
| c17960.graph_c1 | F | TCCCCATCATTGGTAACCTTCA | AB: *t*=-4.273, *p* < 0.05;  MO: *t*=-4.862, *p* < 0.05;  AM: *t*=0.513, *p*=0.635 |
| R | AGGAAACGATTAGCGATGGTAT |
|  | | | |
| c30008.graph_c1 | F | CCAAGTGGAATACAAAGGGGAG | AB: *t*=-4.982, *p* < 0.05;  MO: *t*=-6.534, *p* < 0.05;  AM: *t*=0.822, *p*=0.457 |
| R | TTGGTAACGGTCTTTCCGAGGT |
|  | | | |
| c28892.graph_c0 | F | CCCAAGAATACCATCCACCGAA | AB: *t*=-0.287, *p*=0.800;  MO: *t*=-7.699, *p* < 0.05;  AM: *t*=1.799, *p*=0.146 |
| R | CCCAAGAATACCATCCACCGAA |
|  | | | |
| c31645.graph_c1 | F | GAGAATCAACTCAGGAAACGCA | AB: *t*=-2.437, *p*=0.071;  MO: *t*=-3.939, *p* < 0.05;  AM: *t*=0.140, *p*=0.895 |
| R | CCCTCACACCCCTATCACACAT |
|  | | | |
| c32370.graph_c0 | F | ACAACTTCCCCGTGTTCTTCAT | AB: *t*=-6.094, *p* < 0.05;  MO: *t*=-2.398, *p*=0.139;  AM: *t*=-1.725, *p*=0.160 |
